# Supplementary material
Source: publisher figshare collection journal article supplement (https://karger.figshare.com/ndownloader/files/31013803)
Supplement: Supplementary file 1 [file 31013803]

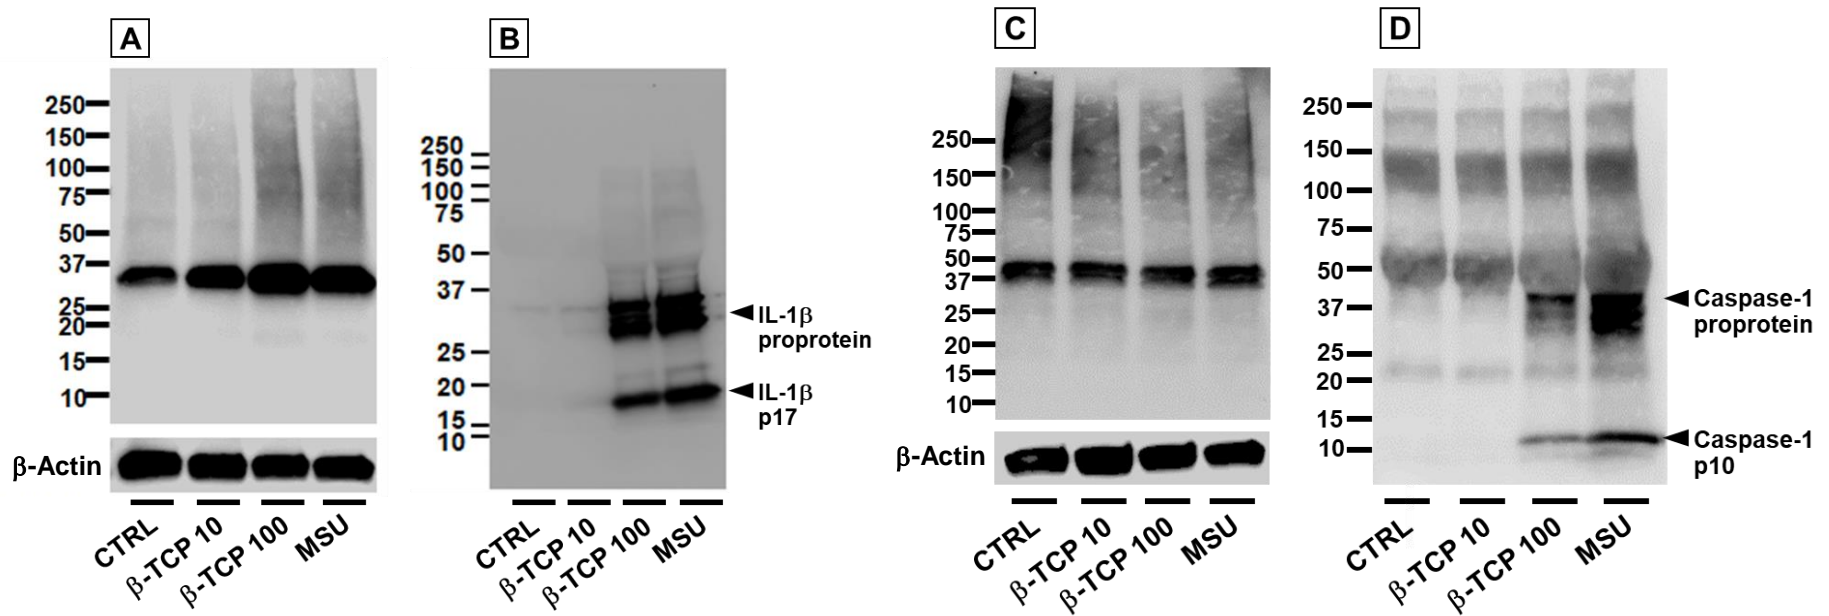

Supplementary Fig. 1. Western blots of whole gels of differentiated human THP-1 cells and THP-1 cells incubated with  $\beta$ -TCP or MSU.

THP-1 cells were differentiated with 0.5  $\mu$ M PMA, then incubated them with 100  $\mu$ g/mL of either  $\beta$ -TCP or MSU. Blots of interleukin-1 $\beta$  (A and B) or caspase-1 (C and D) in cell lysates (A and C) and supernatants (B and D) were shown. Mature IL-1 $\beta$  (p17) and caspase-1 (p10) in supernatants from cells incubated with 100  $\mu$ g/mL of  $\beta$ -TCP or MSU (B and D) were detected.
